# Supplementary material for: Rates of bacterial co-infections and antimicrobial use in COVID-19 patients: a retrospective cohort study in light of antibiotic stewardship
Source: Springer Nature journal article supplement (doi:10.1007/s10096-020-04063-8), 2020-11-02

## Procedure for patients with suspected COVID-19 at university hospital Klinikum rechts der Isar

### Emergency Department algorithm for patients with suspected COVID-19

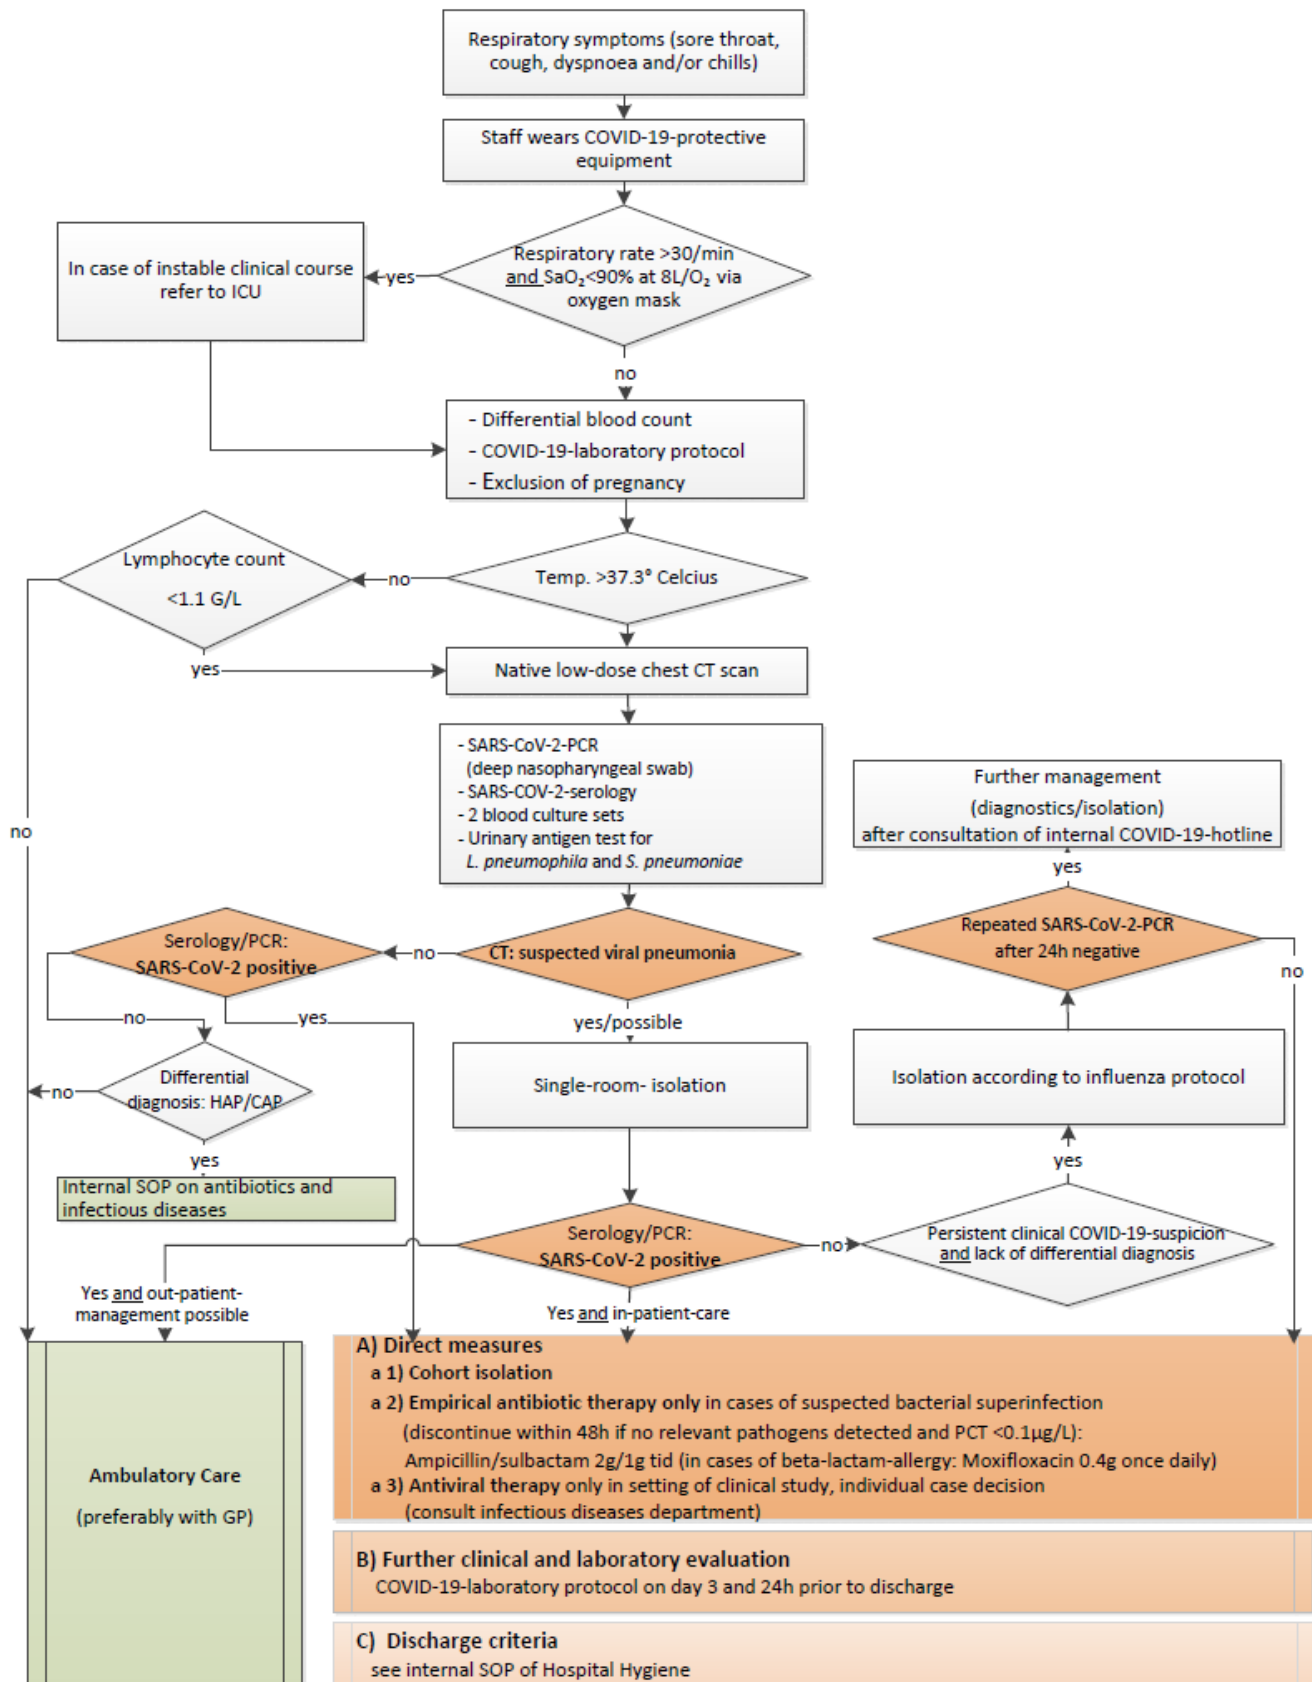

Supplement: MOESM1 [file 18546374]
